# Supplementary material for: Roles of multiwall carbon nanotubes in phytoremediation: cadmium uptake and oxidative burst in Boehmeria nivea (L.) Gaudich
Source: Royal Society of Chemistry journal article supplement (doi:10.1039/c8en00723c), 2019-01-01
Supplement: c8en00723c1.pdf [file c8en00723c1.pdf]

## Supplementary information

**Manuscript title:** Roles of multiwall carbon nanotubes in phytoremediation: cadmium uptake and oxidative burst in *Boehmeria nivea* (L.) Gaudich

**Authors:** Xiaomin Gong,<sup>†,‡</sup> Danlian Huang,<sup>\*,†,‡</sup> Yunguo Liu,<sup>\*,†,‡</sup> Guangming Zeng,<sup>†,‡</sup> Rongzhong Wang,<sup>†,‡</sup> Piao Xu,<sup>†,‡</sup> Chen Zhang,<sup>†,‡</sup> Min Cheng,<sup>†,‡</sup> Wenjing Xue,<sup>†,‡</sup> Sha Chen<sup>†,‡</sup>

<sup>†</sup> College of Environmental Science and Engineering, Hunan University, Changsha 410082, China

<sup>‡</sup> Key Laboratory of Environmental Biology and Pollution Control (Hunan University), Ministry of Education, Changsha 410082, China

\* Corresponding authors:

E-mail address: huangdanlian@hnu.edu.cn (Danlian Huang)

liuyunguo2012@yeah.net (Yunguo Liu)

Tell: +86-13017295768; fax: +86-731-88823701

## 1. Cadmium (Cd) adsorption experiment

Cd adsorption experiment was carried out using MWCNTs as the sorbents. Cd solution was prepared by dissolving the analytic grade  $\text{Cd}(\text{NO}_3)_2 \cdot 4\text{H}_2\text{O}$ . To be specific, 100 mL conical flasks which contain different amounts of MWCNTs and 50 mL Cd solution ( $30 \text{ mg L}^{-1}$ ) were placed on a thermostat water bath shaker at 120 rpm and  $25^\circ\text{C}$  for 24 h. The used concentrations of MWCNTs were 100, 500, 1000 and  $5000 \text{ mg L}^{-1}$ . After adsorption, the solutions were collected and filtered through  $0.48 \mu\text{m}$  pore size nylon filters. The concentration of Cd in the filtrates was determined by the atomic adsorption spectrometer (AAS, PEAA700, PerkinElmer). The removal efficiency ( $R$ ) of Cd by MWCNTs was calculated as follows:

$$R(\%) = \frac{C_0 - C_e}{C_0} \times 100\%$$

where  $C_0$  and  $C_e$  are the initial and equilibrium concentrations of Cd ( $\text{mg L}^{-1}$ ). The adsorption experiment was performed in triplicate and the experimental data was presented as means  $\pm$  standard errors of the three replicates.

**Table S1** Basic characteristics of multiwall carbon nanotubes

| Parameter                          | Value                      |
|------------------------------------|----------------------------|
| Purity                             | > 95 wt%                   |
| Diameter                           | 10-30 nm                   |
| Length                             | 10-30 $\mu\text{m}$        |
| Aspect ratio                       | 333-3000                   |
| Hydrodynamic<br>diameter (average) | 8.5 $\mu\text{m}$          |
| Specific surface area              | >100 $\text{m}^2/\text{g}$ |
| Electric conductivity              | >100 $\text{s/cm}$         |

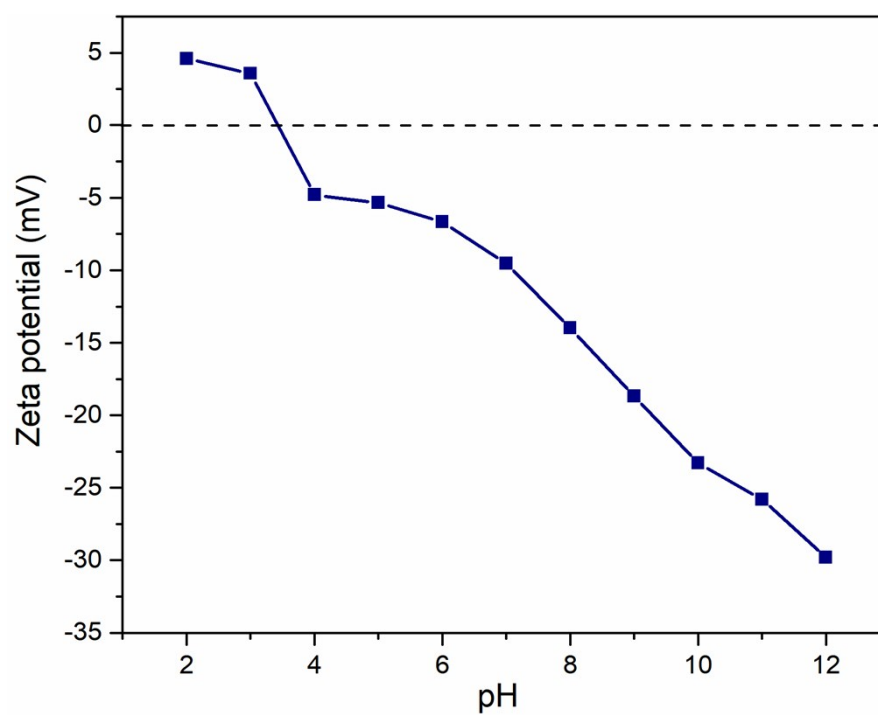

**Fig. S1** Zeta potential of multiwall carbon nanotubes

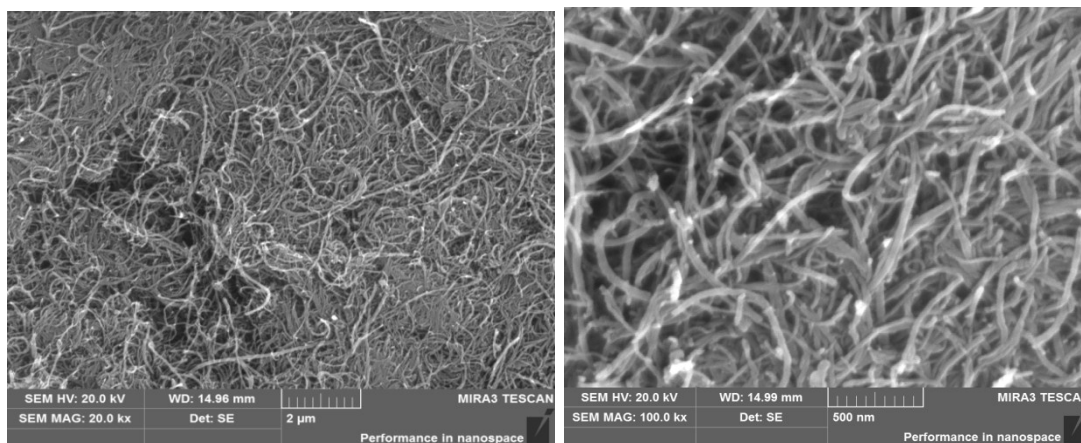

**Fig. S2** SEM images of multiwall carbon nanotubes.

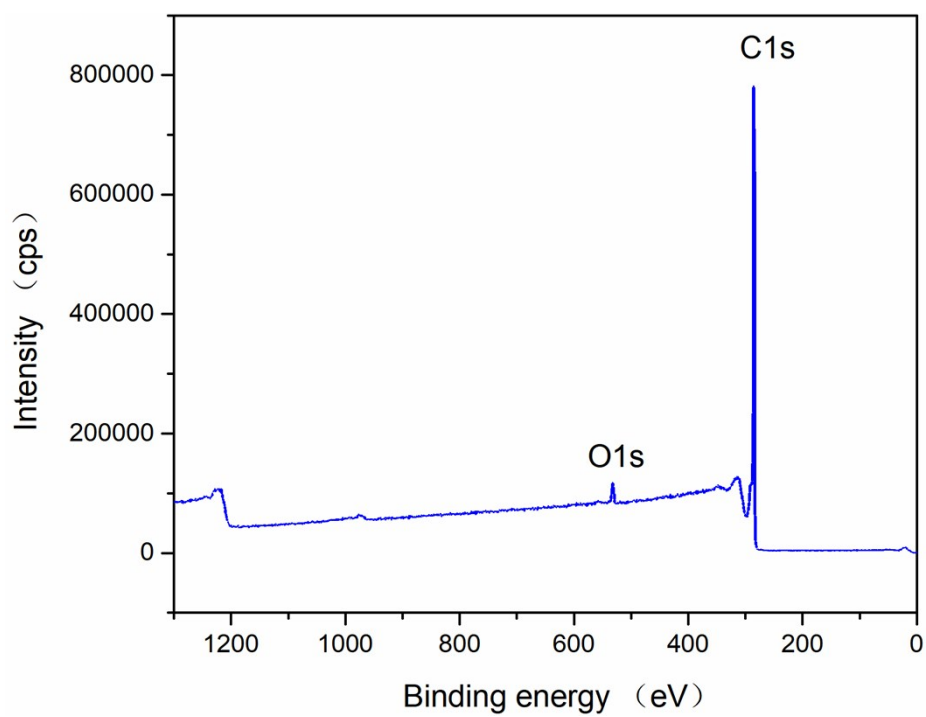

**Fig. S3** XPS spectrum for multiwall carbon nanotubes

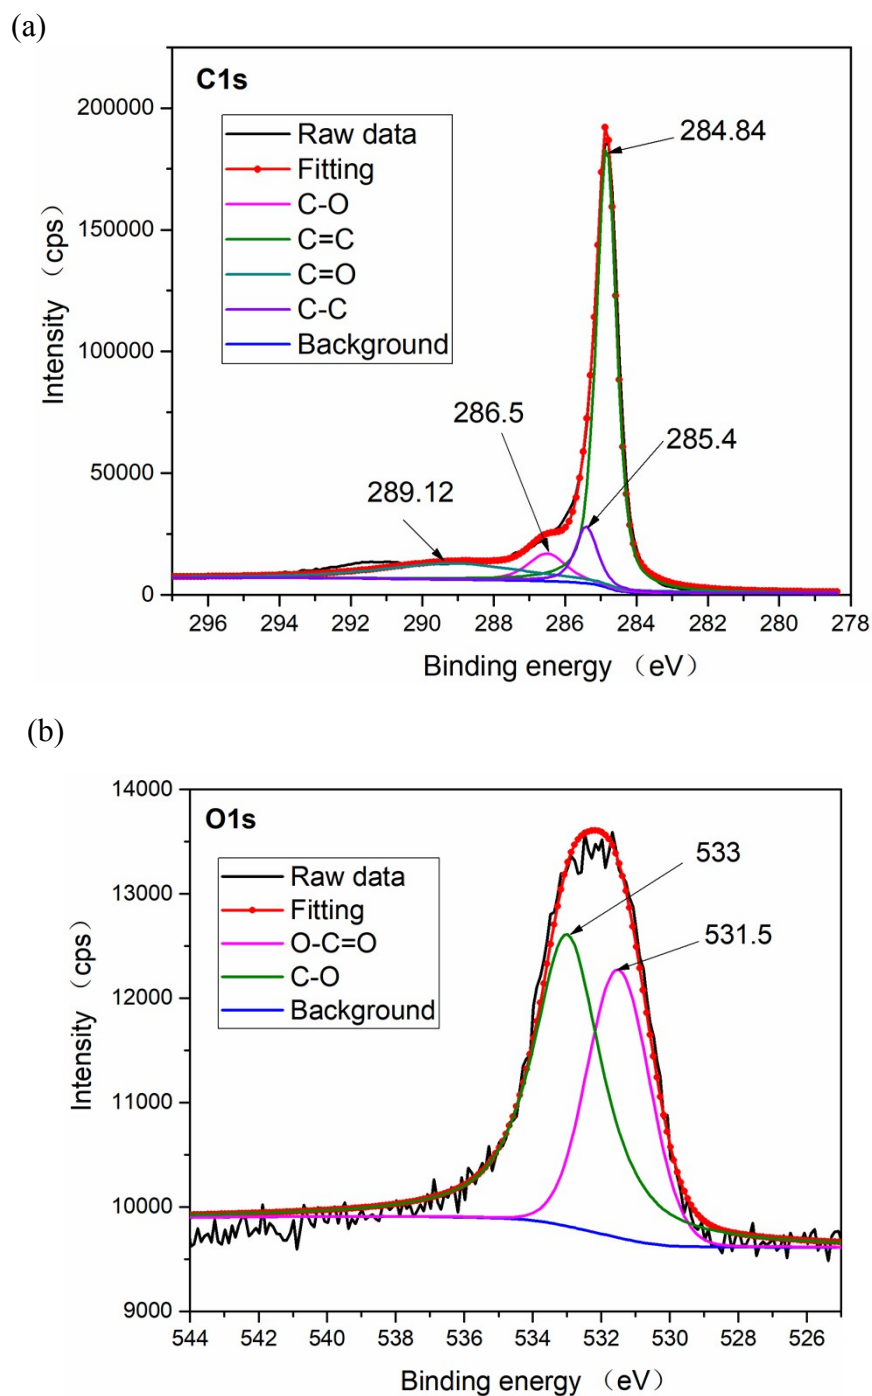

**Fig. S4** XPS spectra of C1s (a) and O1s (b) for multiwall carbon nanotubes

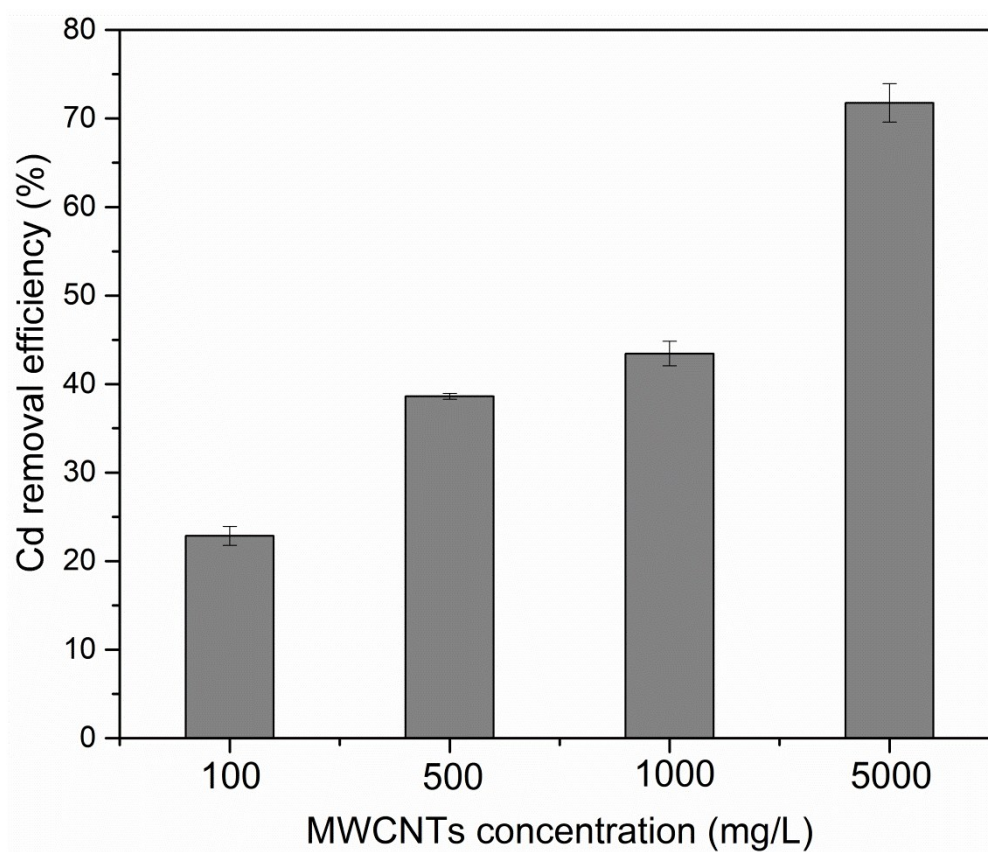

**Fig. S5** Adsorption of cadmium by multiwall carbon nanotubes at different concentrations
